# Supplementary material for: An A-site management and oxygen-deficient regulation strategy with a perovskite oxide electrocatalyst for the oxygen evolution reaction
Source: Royal Society of Chemistry journal article supplement (doi:10.1039/d1ta09306a), 2021-12-14
Supplement: d1ta09306a1.pdf [file d1ta09306a1.pdf]

## Supporting information

For

### **A-site Management and Oxygen-Deficient Regulation Strategy with Perovskite Oxide Electrocatalyst for Oxygen Evolution Reaction**

Changhai Liu<sup>a</sup>, Dingwei Ji<sup>a</sup>, Hong Shi<sup>c</sup>, Zhenyu Wu<sup>c</sup>, Hui Huang<sup>c,\*</sup>, Zhenhui Kang<sup>c,d</sup>, and Zhidong Chen<sup>a,b,\*</sup>,

*<sup>a</sup>School of Materials Science and Engineering, Jiangsu Key Laboratory of Materials Surface Science and Technology, Jiangsu Collaborative Innovation Center of Photovoltaic Science and Engineering, Changzhou University, Changzhou, 213164, Jiangsu, China.*

*<sup>b</sup>School of Petrochemical Engineering, Changzhou University, Changzhou, 213164, Jiangsu, China. E-mail: zdchen@cczu.edu.cn*

*<sup>c</sup>Institute of Functional Nano & Soft Materials (FUNSOM), Jiangsu Key Laboratory for Carbon-Based Functional Materials & Devices, Soochow University, 199 Ren'ai Road, Suzhou, 215123, Jiangsu, PR China. E-mail: hhuang0618@suda.edu.cn*

*<sup>d</sup>Macao Institute of Materials Science and Engineering, Macau University of Science and Technology, Taipa 999078, Macau SAR, China*

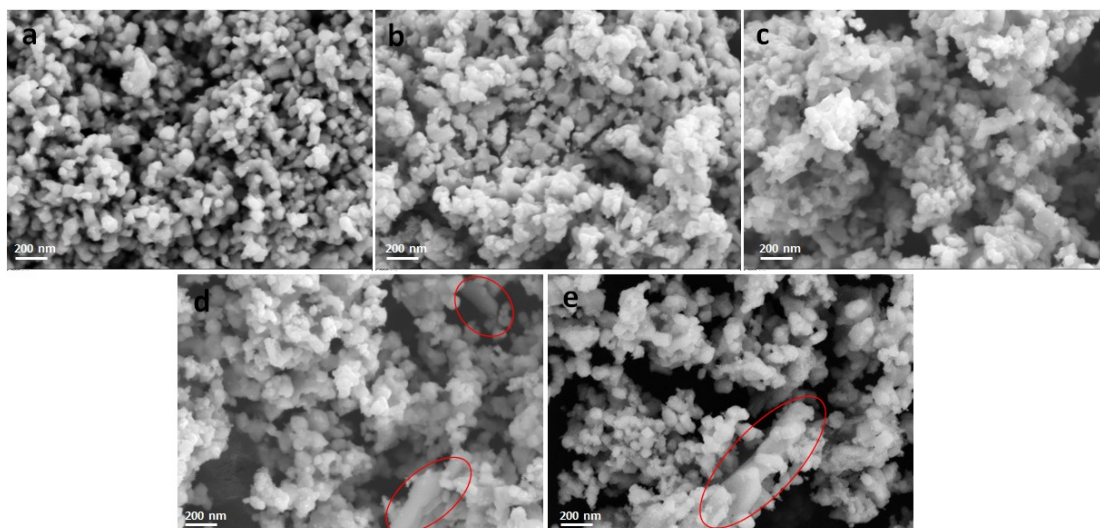

**Figure S1.** SEM images of a)  $\text{LaNiO}_3$ , b) LSN-0.05, c) LSN-0.15, d) LSN-0.1 ( $800^\circ\text{C}$ ), and e) LSN-0.1 ( $900^\circ\text{C}$ ).

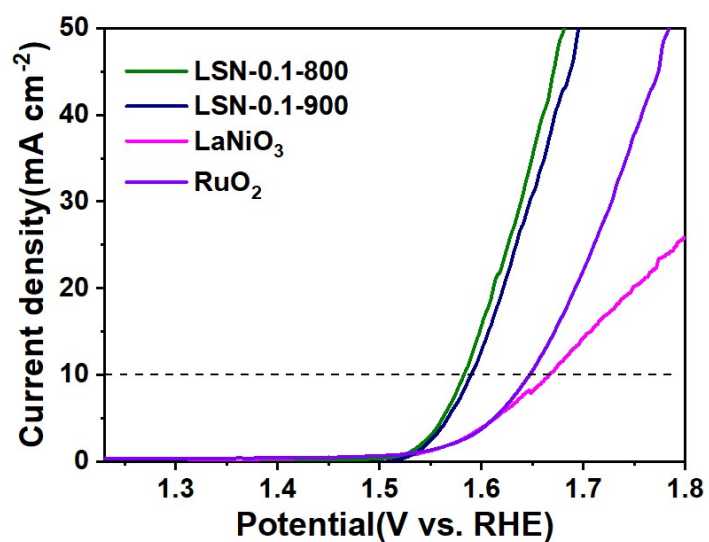

**Figure S2.** OER polarization curves of LSN-0.1-800, LSN-0.1-900,  $\text{LaNiO}_3$ , and  $\text{RuO}_2$ , in 0.1 M KOH solution.

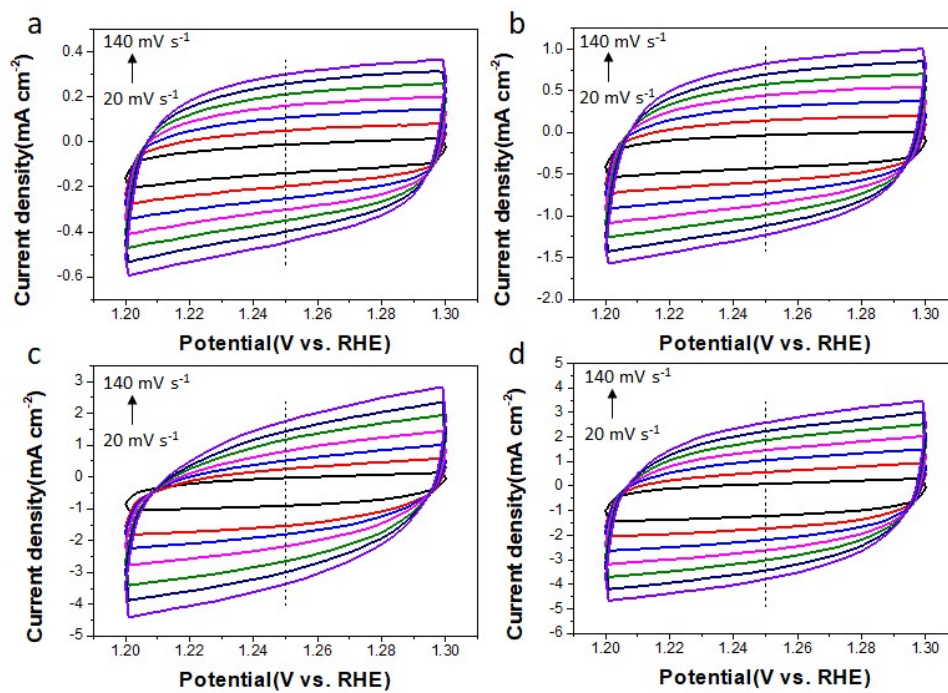

**Figure S3.** CV curves of a) LaNiO<sub>3</sub>, b) L0.85S0.05N, c) L0.85S0.15N, and d) L0.9S0.1N, respectively, with different scan rate from 20 to 140 mV.

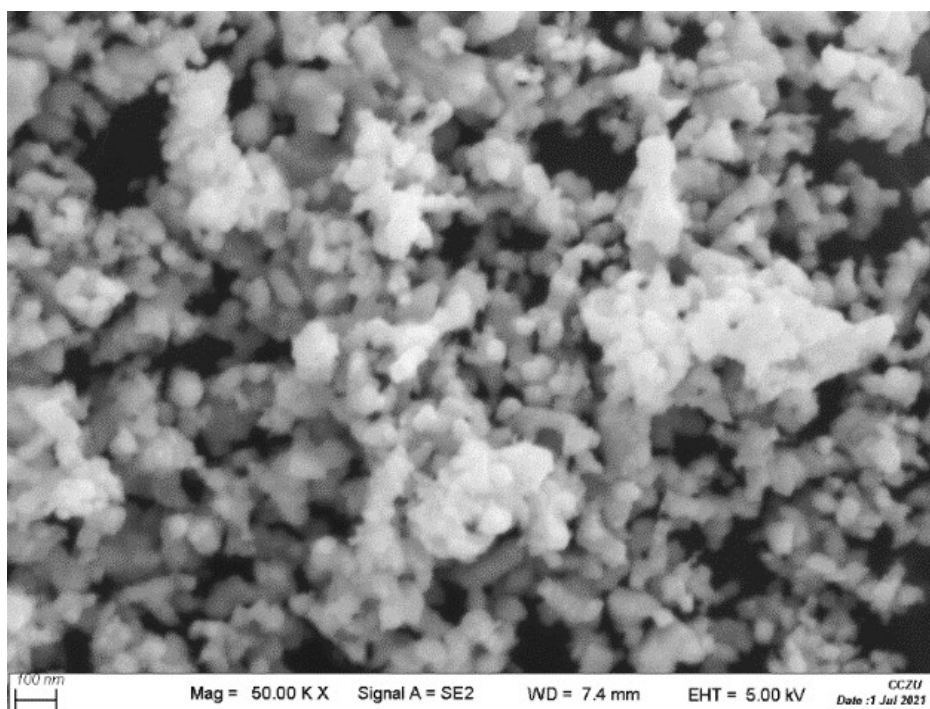

**Figure S4.** SEM image of L0.9S0.1N after long-term stability measurement.

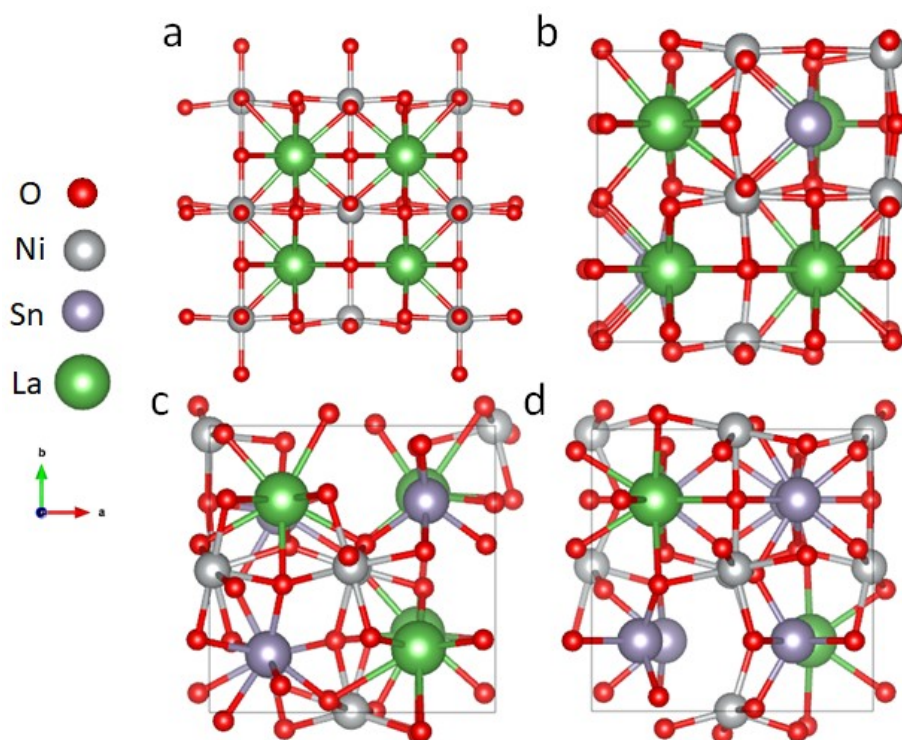

**Figure S5.** Calculation models of (a)  $\text{LaNiO}_3$ , (b)  $\text{L}_{0.95}\text{S}_{0.05}\text{N}$ , (c)  $\text{L}_{0.9}\text{S}_{0.1}\text{N}$ , and (d)  $\text{L}_{0.85}\text{S}_{0.15}\text{N}$ , respectively, with oxygen vacancy in the structure.

**Table S1.** Chemical composition of  $\text{La}_{1-x}\text{Sn}_x\text{NiO}_{3-\delta}$  by ICP-AES analysis.

| Sample           | La (mg L <sup>-1</sup> ) | Ni (mg L <sup>-1</sup> ) | Sn (mg L <sup>-1</sup> ) | Composition                                               |
|------------------|--------------------------|--------------------------|--------------------------|-----------------------------------------------------------|
| $\text{LaNiO}_3$ | 43.6                     | 43.48                    | -----                    | $\text{La}_{1.003}\text{NiO}_3$                           |
| <b>LSN-0.05</b>  | 41.72                    | 44.12                    | 2.12                     | $\text{La}_{0.946}\text{Sn}_{0.048}\text{NiO}_{3-\delta}$ |
| <b>LSN-0.1</b>   | 45.28                    | 50.60                    | 4.8                      | $\text{La}_{0.895}\text{Sn}_{0.095}\text{NiO}_{3-\delta}$ |
| <b>LSN-0.15</b>  | 44.36                    | 52.88                    | 7.52                     | $\text{La}_{0.839}\text{Sn}_{0.142}\text{NiO}_{3-\delta}$ |

**Table S2.** The binding energy (BE) and relative concentration of oxygen species from the deconvoluted O 1s XPS peaks.

| Perovskite electrocatalysts |                | O 1s   |       |       |       | Area ratio    |
|-----------------------------|----------------|--------|-------|-------|-------|---------------|
|                             |                | O1     | O2    | O3    | O4    | O2/(O1+O3+O4) |
| $\text{LaNiO}_3$            | Position [eV]  | 528.6  | 529.5 | 531.4 | 532.4 | 0.042         |
| LSN-0.05                    | Proportion [%] | 18.6   | 4.0   | 60.7  | 16.7  |               |
| LSN-0.1                     | Position [eV]  | 528.6  | 529.5 | 531.4 | 532.4 | 0.140         |
|                             | Proportion [%] | 18.2   | 12.3  | 55.4  | 14.1  |               |
| $\text{LaNiO}_3$            | Position [eV]  | 528.4  | 529.5 | 531.4 | 532.4 | 0.197         |
| LSN-0.05                    | Proportion [%] | 14.4   | 16.6  | 59.7  | 9.3   |               |
| LSN-0.1                     | Position [eV]  | 528.65 | 529.5 | 531.3 | 532.4 | 0.187         |
|                             | Proportion [%] | 19.7   | 15.8  | 54.7  | 9.8   |               |

**Table S3.** ESCA values under OER condition.

| Catalysts          | C(F/g) | ECSA(m <sup>2</sup> /g) |
|--------------------|--------|-------------------------|
| LaNiO <sub>3</sub> | 2.67   | 4.45                    |
| LSN-0.05           | 6.98   | 11.64                   |
| LSN-0.1            | 21.46  | 35.77                   |
| LSN-0.1&800        | 14.69  | 24.48                   |
| LSN-0.1&900        | 12.63  | 21.01                   |
| LSN-0.15           | 17.79  | 29.65                   |

**Table S4.** The fitting parameters of EIS results

|                    | <i>R<sub>s</sub>/Error</i> | <i>Q/Error</i>   | <i>n/Error</i> | <i>R<sub>CT</sub>/Error</i> |
|--------------------|----------------------------|------------------|----------------|-----------------------------|
| LaNiO <sub>3</sub> | 17.69,0.911                | 0.0001134,3.311  | 0.6752,0.9891  | 477.7,7.417                 |
| LSN-0.05           | 18.40,1.250                | 0.0001921,4.244  | 0.6602,2.120   | 90.6,4.976                  |
| LSN-0.1            | 17.78,1.051                | 0.0001494,14.729 | 0.6428,3.274   | 37.1,4.448                  |
| LSN-0.15           | 18.87,0.914                | 0.0006348,5.755  | 0.7238,1.292   | 187.8,3.075                 |

**Table S5.** Comparison of different perovskite-type oxides catalyst performance.

| Catalysts                                                                                                  | OER performance (mA/cm <sup>2</sup> ) | OER Tafel slope(mV/dec) | References       |
|------------------------------------------------------------------------------------------------------------|---------------------------------------|-------------------------|------------------|
| La <sub>x</sub> Sn <sub>1-x</sub> NiO <sub>3</sub>                                                         | 320                                   | 74                      | <i>This work</i> |
| La <sub>x</sub> MnO <sub>3</sub>                                                                           | 419/                                  | 259                     | Ref.1            |
| La <sub>x</sub> Sr <sub>1-x</sub> Co <sub>y</sub> Fe <sub>1-y</sub> O <sub>3</sub>                         | 360                                   | 77                      | Ref.2            |
| La <sub>x</sub> Sr <sub>1-x</sub> CoO <sub>3</sub>                                                         | 340                                   | 71                      | Ref.3            |
| La <sub>x</sub> CoO <sub>3</sub>                                                                           | 380                                   | 83                      | Ref.4            |
| La <sub>x</sub> Ce <sub>1-x</sub> CoO <sub>3</sub>                                                         | 430                                   | 112                     | Ref.5            |
| La <sub>1-x</sub> CoO <sub>3</sub>                                                                         | 380                                   | 83                      | Ref.6            |
| Pr <sub>0.5</sub> Ba <sub>0.5</sub> Mn <sub>1.8-x</sub> Nb <sub>x</sub> Co <sub>0.2</sub> O <sub>6-δ</sub> | 370                                   | 109                     | Ref.7            |
| BaPrMn <sub>2-x</sub> Co <sub>x</sub> O <sub>5+δ</sub>                                                     | 430                                   | 102                     | Ref.8            |
| La <sub>0.8</sub> Sr <sub>0.2</sub> Mn <sub>1-x</sub> Co <sub>x</sub> O <sub>3</sub>                       | 439                                   | 133                     | Ref.9            |
| La <sub>0.6</sub> Sr <sub>0.4</sub> CoO <sub>3-δ</sub>                                                     | 421                                   | 123                     | Ref.10           |
| (La <sub>0.8</sub> Sr <sub>0.2</sub> ) <sub>1-x</sub> MnO <sub>3</sub>                                     | 540                                   | 326                     | Ref.11           |
| La <sub>0.6</sub> Sr <sub>0.4</sub> CoO <sub>3-δ</sub>                                                     | 400                                   | 105                     | Ref.12           |

## References:

1. G. S. Hegde, A. Ghosh, R. Badam, N. Matusmi and R. Sundara, *ACS Appl. Energy Mater.*, 2020, **3**, 135566.
2. W. Guo, L. Cui, H. W. Xu and C. R. Gong, *Appl. Surf. Sci.*, 2020, **529**, 147165.
3. Y. Lu, A. J. Ma, Y. F. Yu, R. Tan, C. W. Liu, P. Zhang, D. Liu and J. Z. Gui, *ACS Sustainable Chem. Eng.*, 2019, **7**, 2906-2910.
4. H. Z. Wang, X. Q. Chen, D. Huang, M. Zhou, D. Ding and H. M. Luo, *ChemCatChem*, 2020, **12**, 2768-2775.
5. J. M. Qian, T. T. Wang, Z. M. Zhang, Y. G. Liu, J. F. Li and D. Q. Gao, *Nano Energy*, 2020, **74**, 104948.
6. H. Z. Wang, X. Q. Chen, D. Huang, M. Zhou, D. Ding and H. M. Luo, *ChemCatChem*, 2020, **12**, 2768-2775.
7. S. Mondal, R. Majee, Q. A. Islam and S. Bhattacharyya, *ChemCatChem*, 2020, **7**, 5005-5012.
8. R. Majee, Q. A. Islam, S. Mondal and S. Bhattacharyya, *Chem. Sci.*, **2020**, **11**, 10180-10189.
9. C. H. Li, J. S. Cheng, Y. Jiang, W. Xiao and X. M. Yan, *J. Power Sources*, 2021, **498**, 229940.
10. O. Miyeong, L. Jongju, P. Hyoseok, T. K. Young, Y. S. Lee, V. Aravindan and N. Giseok, *J. Ind. Eng. Chem.*, 2019, **80**, 686-689.
11. R. H. Yuan, Y. He, W. He, M. Ni and M. Leung, *Appl. Energy*, 2019, **251**, 113406.
12. V. F. Mattick, X. F. Jin, R. E. White and K. Huang, *J. Electrochem. Energy Convers. Storage*, 2019, **23**, 537-543.
